# Supplementary material
Source: publisher figshare collection journal article supplement (https://acs.figshare.com/ndownloader/files/5548199)
Supplement: Supplementary file 1 [file 5548199]

## *Supporting Information*

# Three-dimensional Branched TiO<sub>2</sub> Architectures in Controllable Bloom for Advanced Lithium-ion Batteries

*Shaofu Wang,<sup>†,‡,⊥</sup> Dandan Qu,<sup>†,‡,⊥</sup> Yun Jiang,<sup>‡</sup> Wan-Sheng Xiong,<sup>†</sup> Hong-Qian Sang,<sup>†</sup> Rong-Xiang He,<sup>†</sup> Qidong Tai,<sup>†</sup> Bolei Chen,<sup>†</sup> Yumin Liu,<sup>\*,†</sup> and Xing-Zhong Zhao<sup>\*,†,§</sup>*

<sup>†</sup> Institute for Interdisciplinary Research, Jiangnan University, Wuhan 430056, China.

<sup>‡</sup> Key Laboratory of Optoelectronic Chemical Materials and Devices, Ministry of Education, Jiangnan University, Wuhan 430056, China.

<sup>§</sup> School of Physics and Technology, Key Laboratory of Artificial Micro/Nano Structures, Ministry of Education, Wuhan University, Wuhan 430072, China.

<sup>⊥</sup>These authors contributed equally.

### **Corresponding Author**

\*Email: ymliu@jhun.edu.cn

\*Email: xzzhao@whu.edu.cn

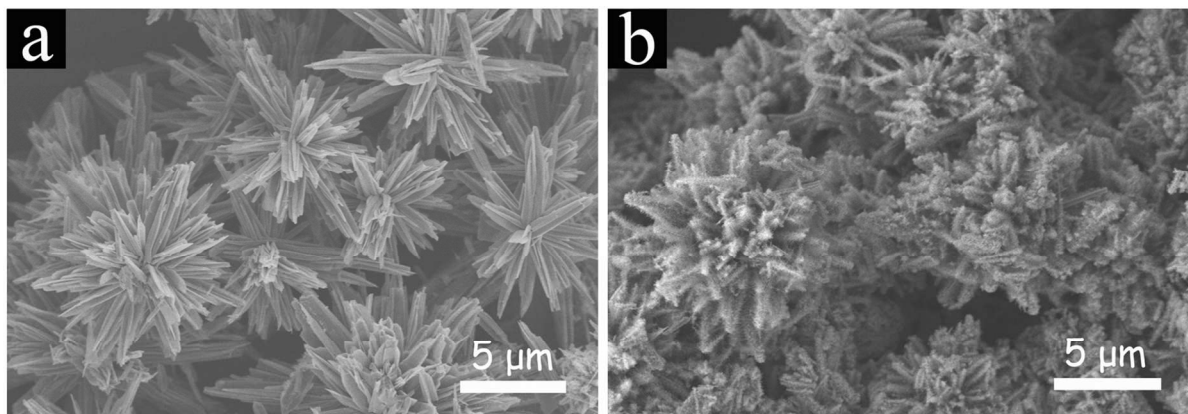

**Figure S1.** FE-SEM images with low magnification for (a) BTA-3 and (b) BTA-4 samples.

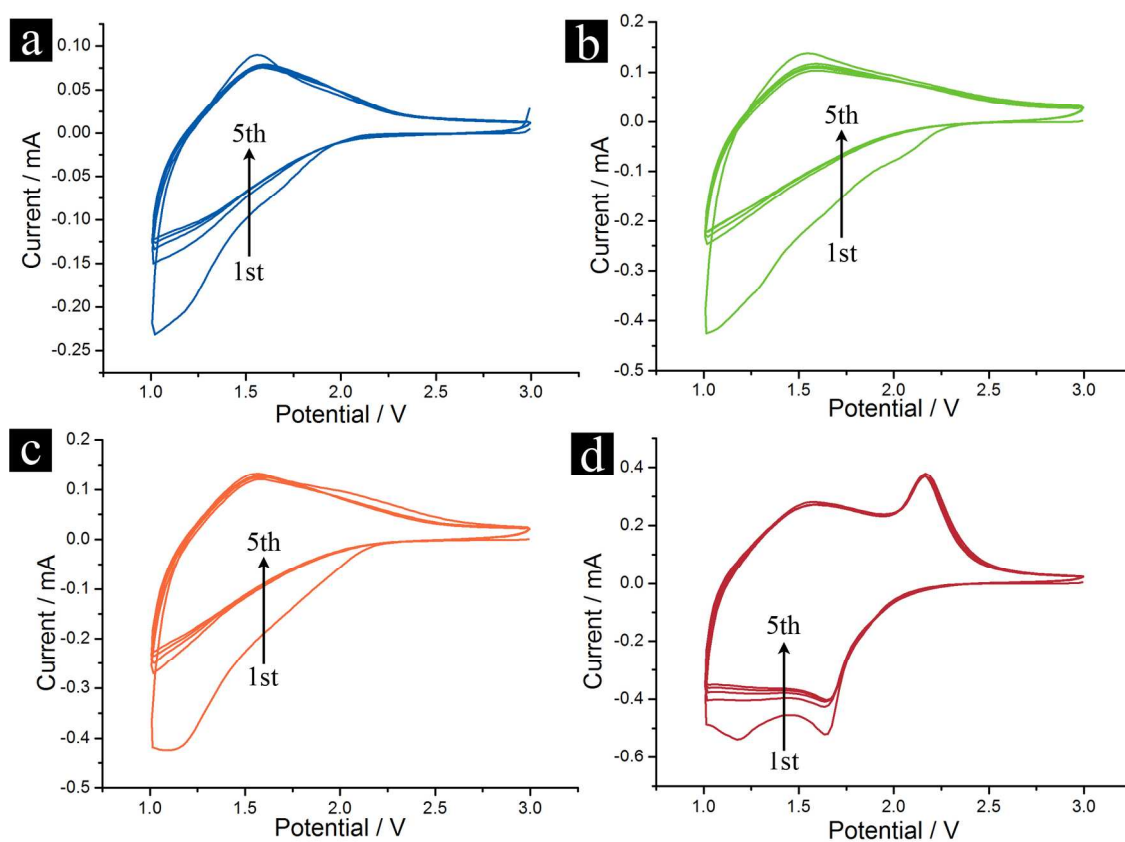

**Figure S2.** Cyclic voltammograms of (a) BTA-1, (b) BTA-2, (c) BTA-3, and (d) BTA-4 for the first five cycles between 1.0 and 3.0 V at a scan rate of  $1 \text{ mV s}^{-1}$ .

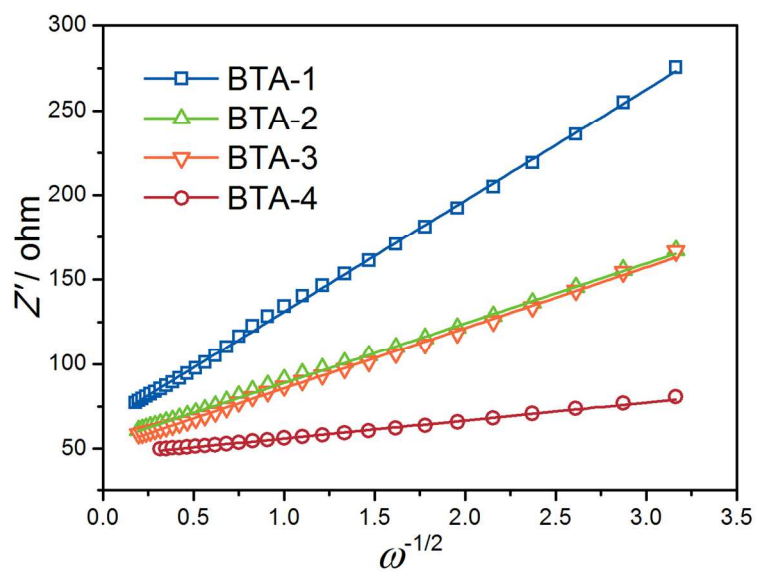

**Figure S3.** The linear fitting of  $Z'$  vs.  $\omega^{-1/2}$  plots for different BTA anodes.
